# Supplementary material for: Modeling the Benefits of Cooperative Drafting: Is There an Optimal Strategy to Facilitate a Sub-2-Hour Marathon Performance?
Source: Springer Nature journal article supplement (doi:10.1007/s40279-018-0991-4), 2018-10-08
Supplement: MOESM1 [file 16182594]

#### *Appendix*

**Modeling the benefits of cooperative drafting:
Is there an optimal strategy to facilitate a sub-2-hour marathon performance?**

W. Hoogkamer, K.L. Snyder, and C.J. Arellano

1. **The hyperbolic velocity-time relation for Eliud Kipchoge**

The velocity-time curve is captured by a hyperbolic relation, where *CV* is defined by the vertical asymptote (Fig. S1, dashed line) and *D’* is the curvature constant, which can be visually represented by the geometrical area of the shaded rectangles. Because *D*’ is constant, the area for each shaded rectangle is the same along the curvature of the hyperbolic curve, where height is time (in seconds) and width is running velocity (in m/s). Therefore, multiplying the respective time and running velocity values (e.g. s × m/s) at any point along the curve yields the value of *D*’ in meters. Using Kipchoge’s race performances yields a *CV* and *D*’ of 6.04m/s and 250m, respectively [1].


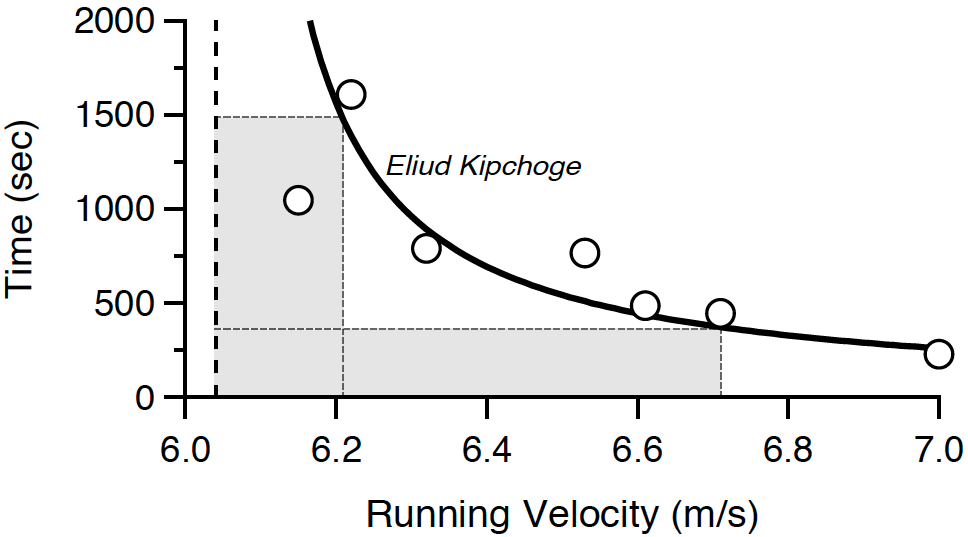


**Fig. S1.** The hyperbolic velocity-time relation for Eliud Kipchoge. A fit of the model (Eq. 1) indicates that Kipchoge’s critical running velocity is equal to 6.04m/s (defined by the vertical asymptotic line) and his *D’* equal to 250m (defined by the curvature constant and represented by the shaded rectangle). Individual data points were extracted from IAAF.org and are based on Kipchoge’s outdoor race performances ranging from 1500m to 10,000m [1].

1. **Perceived velocity when drafting behind another runner at world record pace**

Equation B1, by Léger and Mercier [2], covers the curvilinear relationship between running velocity (V) and metabolic rate during overground running:

V̇O2 (ml O2/kg/min) = 2.209 + 11.39·V + 0.02724·V3 (B1)

It predicts a rate of oxygen uptake of 72.46 ml O2/kg/min for running at 5.72m/s (2:02:57 pace). Drafting ~1m behind another runner reduces the rate of oxygen uptake by 6.5% [3]:

72.46 · (100% – 6.5%) = 67.75 ml O2/kg/min (B2)

Solving the equation B1 for V at this reduced rate of oxygen uptake:

V̇O2 (ml O2/kg/min) = 2.209 + 11.39·V + 0.02724·V3 = 67.75 ml O2/kg/min (B3)

results in an equivalent velocity V of 5.38 m/s, which is 5.94% slower than 5.72m/s. Note that this percentage varies with running velocity. For example, solving equations B1–B3 at 6.02m/s results in a 5.98% slower velocity. In our simulations, we conservatively presume that drafting behind another runner will be perceived as running 5.9% slower over the range of simulated running velocities (5.7 – 6.1m/s).

1. **Rationale behind simulating drafting at 5.89m/s**

Since drafting behind another runner is metabolically similar to running 5.9% slower (Appendix B), alternating leading and drafting shifts of equal duration will on average provide a 2.95% advantage (0.5·5.9%). Therefore, to clearly show the effects of different drafting strategies on running performance, we used a running velocity of 2.95% faster than world record pace (5.72m/s·102.95% = 5.89m/s). Note that finishing the marathon distance in under 2 hours after a 1:01:28 first half will require a substantially faster running velocity of 6.01m/s during the second half. Drafting at this faster velocity would be perceived as running at 5.66m/s. This drafting velocity is close to the *SV* of athlete A and beyond that of the other athletes in Table 1 and would be too fast to clearly show the interactions between running velocity, drafting and *D’* depletion and recovery for different scenarios.

1. **Duration of a position change**

During a position change, the front runner will slow down to a running velocity that is 5.9% slower than trailing runner to get in recovery mode. At a running velocity of 5.89m/s, the velocity difference between them is 0.35m/s. It will take 5.7s to go from 1m in front of the other runner to 1m behind the other runner (2m / 0.35m/s), conservatively 6s. Then, to make such a position shift worthwhile, we presume that the runner needs to benefit from drafting for another 6s. As such the minimal shift duration is 12s for 2 runners. This minimum duration will also suffice for larger cooperative drafting teams. Each additional runner will make the paceline 1m longer, and it will take 3s longer to get from the front to the last drafting position. However, the runner will also have an additional interval in a drafting position before he needs to lead again.

1. **Optimizing the leading duration**

Figure S2 shows how the duration of the leading (and drafting) shift affects how far the final runner of a 2-runner team can run before he has fully depleted his *D’*, when running at 5.89m/s. A leading shift duration of 42s will allow them to cover the longest distance at this velocity. The global trend shows that the distance first increases with shift duration and then reaches a plateau around 40s and starts to decrease, at a slower rate, beyond 60s. Interestingly, the curve has a prominent sawtooth pattern. Several different durations between 40 and 60s will all result in a similar distance (the peaks of the sawtooth pattern), but in this range, there are other durations that will bring the runners less far (the valleys of the sawtooth pattern). This sawtooth phenomenon shows that it is crucial to select a shift duration that will allow one of the runners to start an additional drafting interval, just before he has fully depleted his *D’*. In the latter scenario (valley), runner 1 might have fully depleted his *D’* during the last second of his leading interval. In that case, he can no longer continue the race, and runner 2 will only be able to do one more interval. Alternatively (peak), if the shift duration would allow runner 1 to finish this interval with still some *D’* left, he now can draft and recover some of his *D’* during the next interval while runner 2 is leading. Then, by the time that runner 2 has fully depleted his *D’*, runner 1 will have had the opportunity to recover which will allow him to cover an additional distance.

**Fig. S2.** The total distance ran when the final runner has fully depleted his *D’* depends on shift duration. For 2 identical runners with the physiological characteristics of Athlete A (Table 1) running at 5.89m/s a shift duration of 42s is optimal (purple circle).

The optimal shift duration varies with both running velocity and the number of runners. We showed in Fig. 2 in the main text that at 5.89m/s both a 3 and 4-runner team can cover the full marathon distance, so to explore how shift duration influences performance in different size teams, we used a faster running velocity of 6.00m/s. At each velocity, a similar pattern emerges, an initial increase after which the sawtooth pattern becomes dominant. For a 4-runner team at this velocity, the distance covered when the final runner has fully depleted *D’* is rather similar for the 3 durations between 50 and 70s that result in a local maximum. Which local maximum results in the global maximum is determined by a variety of factors, including resolution, number of runners, velocity, and their complex interactions.

**Fig. S3.** The total distance ran when the final runner has fully depleted his D’ depends on shift duration. For 2 identical runners **(A)** with the physiological characteristics of Athlete A (Table 1) running at 6.0m/s a shift duration of 104s is optimal (purple circle). For 3 identical runners **(B)** a shift duration of 75s is optimal (purple circle) at this speed. Finally, for 4 identical runners **(C)** a shift duration of 55s is optimal (purple circle) at this speed. This figure also shows, again, the benefit of more runners cooperating as 4 runners can cover 33.326km at this speed, while 2 runners can only cover 26.181km.

1. **References Appendix**
   - - 1. Jones AM, Vanhatalo A. The 'critical power' concept: applications to sports performance with a focus on intermittent high-intensity exercise. Sports Med. 2017;47:65–78.
       2. Léger L, Mercier D. Gross energy cost of horizontal treadmill and track running. Sports Med. 1984;1:270–77.
       3. Pugh LG. The influence of wind resistance in running and walking and the mechanical efficiency of work against horizontal or vertical forces. J Physiol. 1971;213:255–76.
